# Supplementary material for: Concurrent photochemical whitening and darkening of ambient brown carbon
Source: Copernicus journal article supplement (doi:10.5194/acp-2022-483), 2022-07-18
Supplement: Supplementary file 1 [file acp-2022-483-supplement-version6.pdf]

1 Supplementary information of manuscript

2 **Concurrent photochemical whitening and enhancement of ambient**  
3 **brown carbon**

4 Qian Li<sup>1</sup>, Dantong Liu<sup>1\*</sup>, Xiaotong Jiang<sup>1</sup>, Ping Tian<sup>2</sup>, Yangzhou Wu<sup>1</sup>, Siyuan Li<sup>1</sup>, Kang Hu<sup>1</sup>, Quan Liu<sup>3</sup>,  
5 Mengyu Huang<sup>2</sup>, Ruijie Li<sup>2</sup>, Kai Bi<sup>2</sup>, Shaofei Kong<sup>4</sup>, Deping Ding<sup>2</sup>, Chenjie Yu<sup>5</sup>

6 <sup>1</sup>Department of Atmospheric Science, School of Earth Science, Zhejiang University, Hangzhou, 310027, China

7 <sup>2</sup>Beijing Key Laboratory of Cloud, Precipitation and Atmospheric Water Resources, Beijing Meteorological Service, Beijing,  
8 100089, China.

9 <sup>3</sup>State Key Laboratory of Severe Weather & Key Laboratory of Atmospheric Chemistry of CMA, Chinese Academy of  
10 Meteorological Sciences, Beijing, 100081, China

11 <sup>4</sup>Department of Atmospheric Science, School of Environmental Science, China University of Geosciences, Wuhan, 430074,  
12 China

13 <sup>5</sup>Université de Paris Cité and Univ Paris Est Creteil, CNRS, LISA, Paris, France

14 *Correspondence to:* Dantong Liu ([dantongliu@zju.edu.cn](mailto:dantongliu@zju.edu.cn))

15

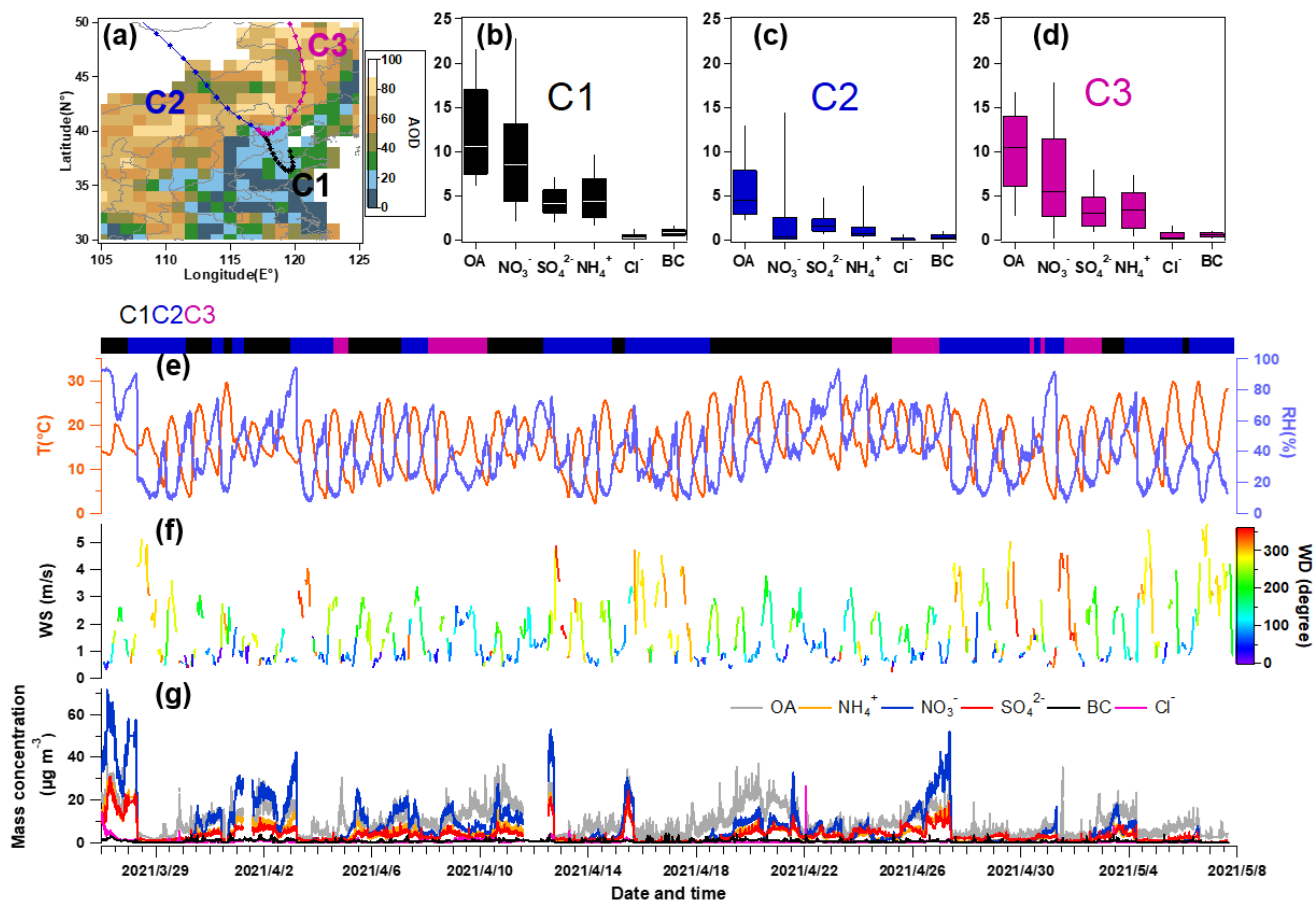

16  
 17  
 18  
 19  
 20  
 21

Figure S1. (a) Clustered back-trajectories for the past 72 hours during the experiment with markers denoting 12h intervals. (b-d) Statistics for the concentrations of key aerosol compositions from each cluster. The whiskers, box boundaries and lines in box denote the 10th/90th percentiles, 25th/75th percentiles and the median, respectively. (e) Time series of RH and T, (f) wind speed and colored by wind direction, (g) mass concentrations of key aerosol compositions.

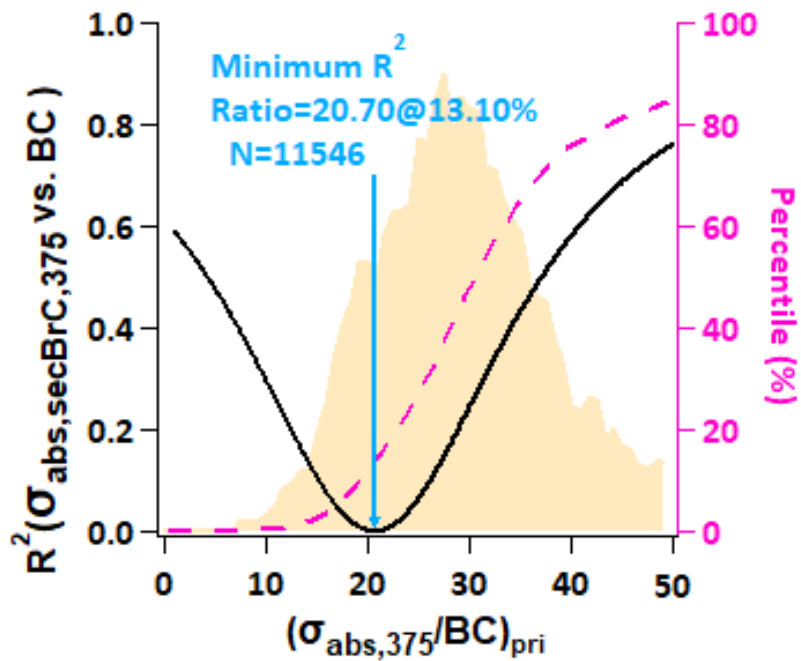

22  
23

Figure S2. Minimum R-square analysis to obtain the  $(\sigma_{\text{abs},375}/BC)_{\text{pri}}$ .

24

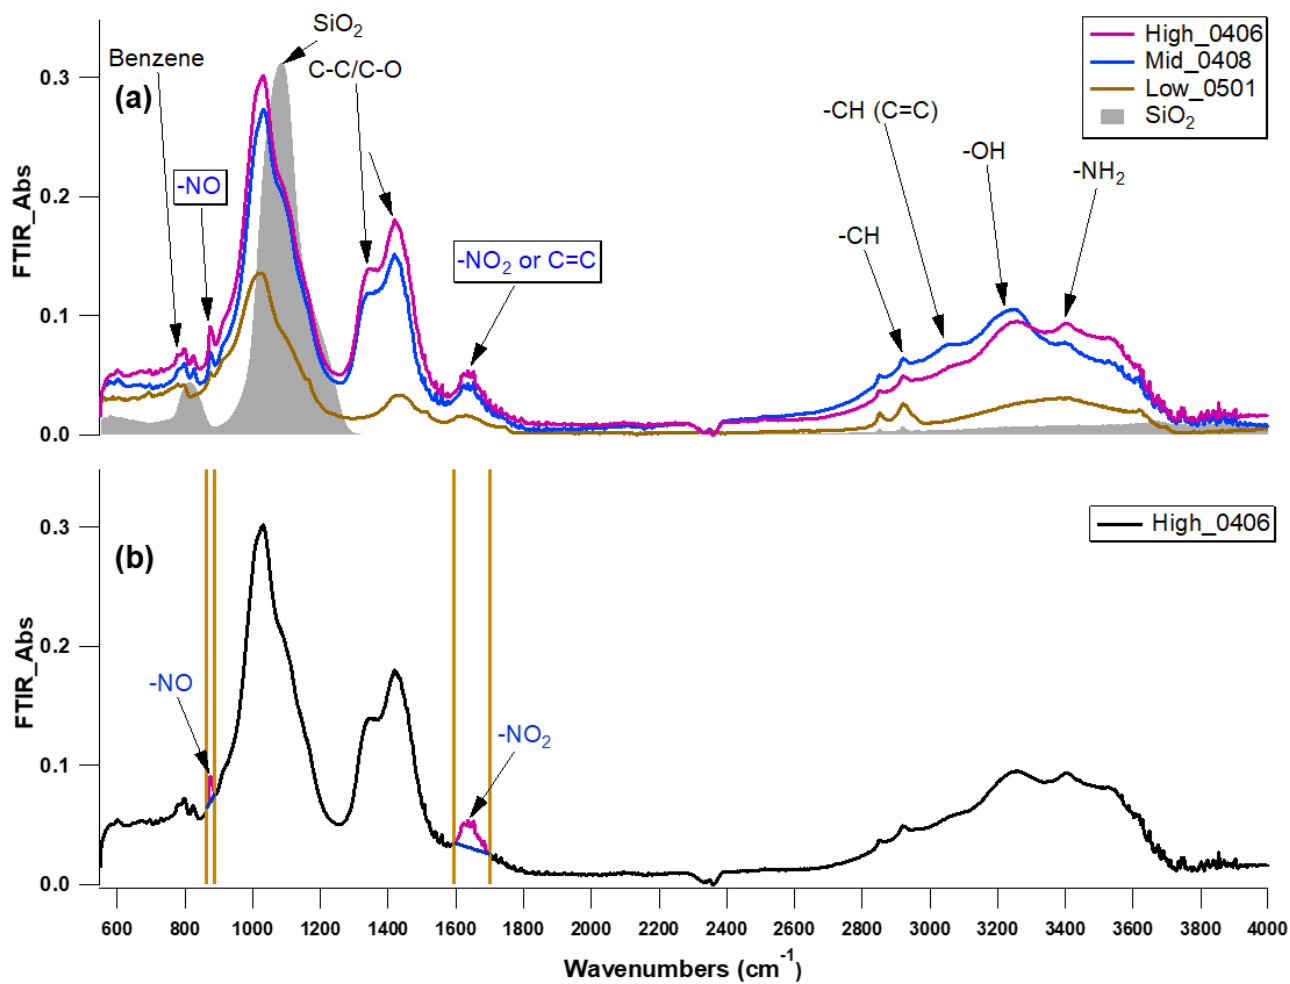

25  
26  
27  
28

Figure S3. (a) The FTIR absorbance spectrum for the blank and filter samples during three days with different pollution levels. The main functional groups in the FTIR spectra are indicated. (b) Method of peak extraction for the -NO and -NO<sub>2</sub> bond.

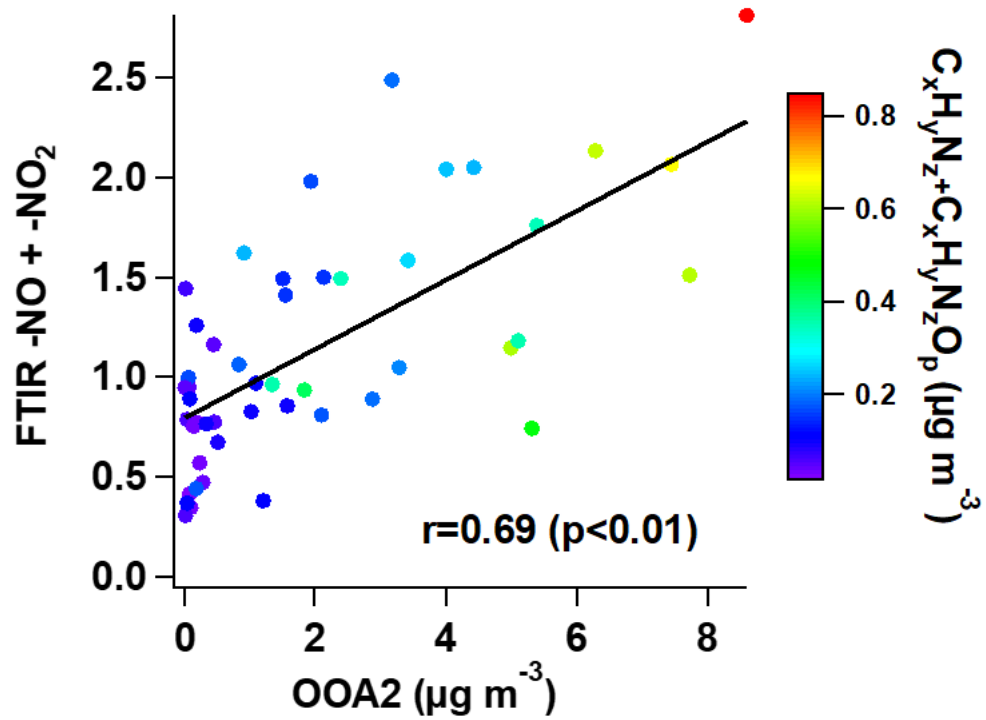

29  
30  
31  
32

Figure S4. Relationship between the FTIR absorption of -NO, -NO<sub>2</sub> bond and the OOA2, colored by the C<sub>x</sub>H<sub>y</sub>N<sub>z</sub> and C<sub>x</sub>H<sub>y</sub>N<sub>z</sub>O<sub>p</sub> fragments measured by the AMS.

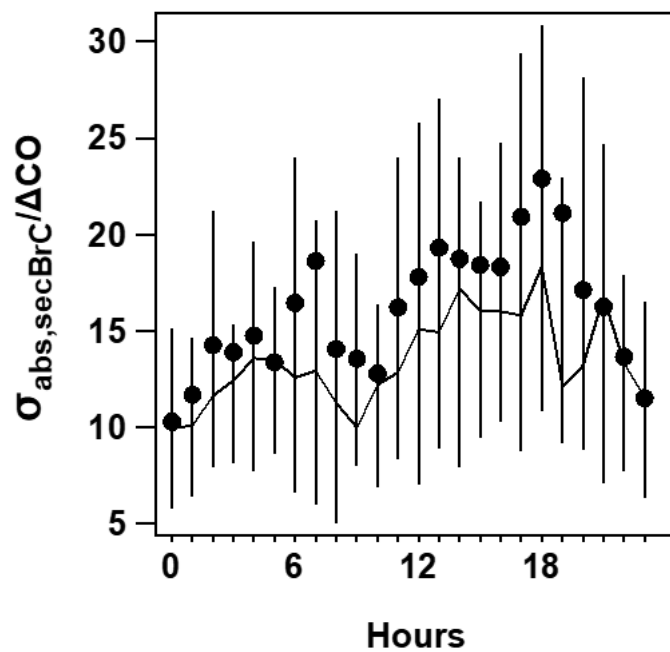

33

34 **Figure S5. Diurnal variations of absorption coefficient at  $\lambda=375\text{nm}$  ( $\sigma_{\text{abs},375}$ ) for secondary BrC/  $\Delta\text{CO}$ . The lines, dots and whiskers**  
 35 **denote the median, mean and the 25th/75th percentiles at each hour respectively.**

36

37 **Text S1. PMF Analysis from the HR-ToF-AMS**

38 The HR-ToF-AMS was operated in V mode with high sensitivity. High resolution mass spectra of organic matrix for  $m/z$  12-  
39 120 were analyzed with PMF2 algorithm (Paatero and Tapper, 1994), following the data processing and factors selecting  
40 steps (Ulbrich et al., 2009; Zhang et al., 2011). The two criteria of the ratio of the scaled residuals ( $Q/Q_{exp}$ ) and the rotational  
41 parameter ( $f_{peak}$ ) to select the best model number of factors. The  $f_{peak}$  parameter represents the rotational sensitivity of the  
42 solution sets, and the range of the  $f_{peak}$  parameter from  $-1$  to  $1$  with steps =  $0.2$  in our study. Factor numbers from  $1$  to  $6$  were  
43 selected to run in the PMF model.

44 The key diagnostic plots of 4 to 6-factor solutions are shown in Figure S5.1-3. For example, a large decrease in  $Q/Q_{exp}$  with  
45 the addition of a factor indicates that the additional factor is able to explain a significant fraction of the variation (Figure  
46 S5.1a). The presence of time-dependent structure in the residual time series suggests the need for additional factor for better  
47 fitting (Figure S5.1e). After a detailed evaluation of time series, mass spectral profiles, diurnal variations, and correlations  
48 with external tracers, the 5-factor solution with  $f_{peak} = 0$  ( $Q/Q_{exp} = 2.38$ ) was chosen.

49

## 4 factors

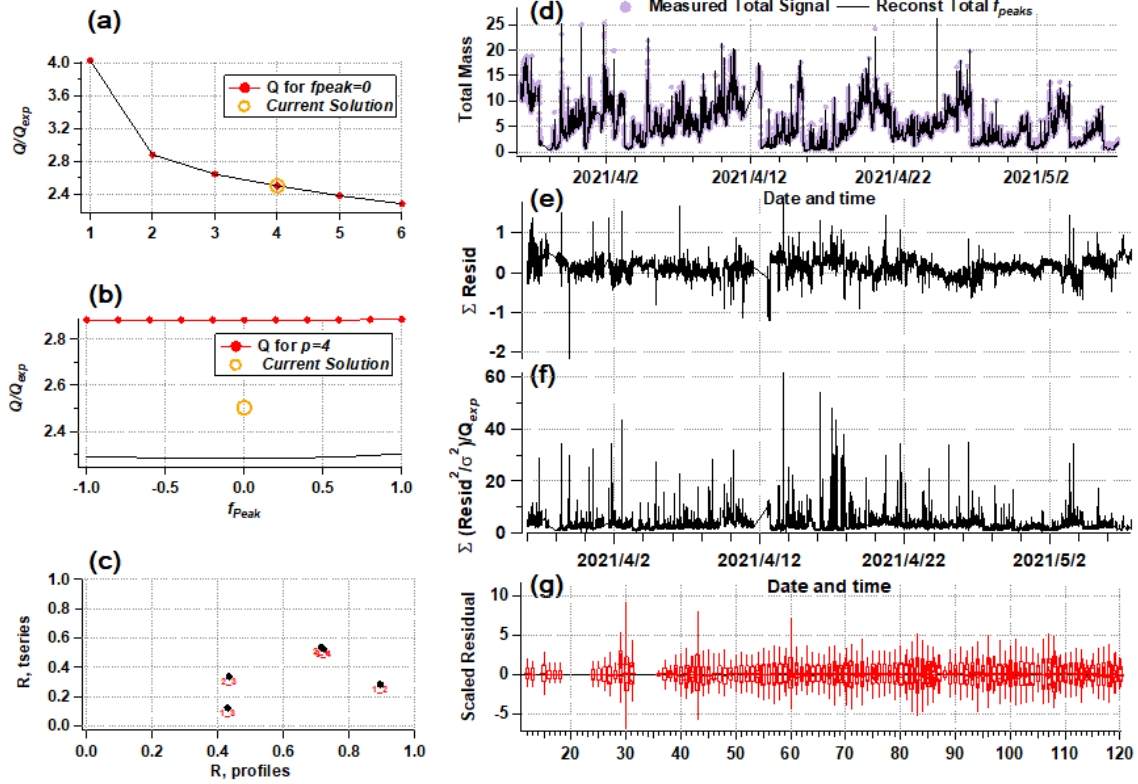

50

51 **Figure S6.1** Diagnostic plots of the 4 factors of PMF analysis on OA mass spectral matrix for the spring observation.

52



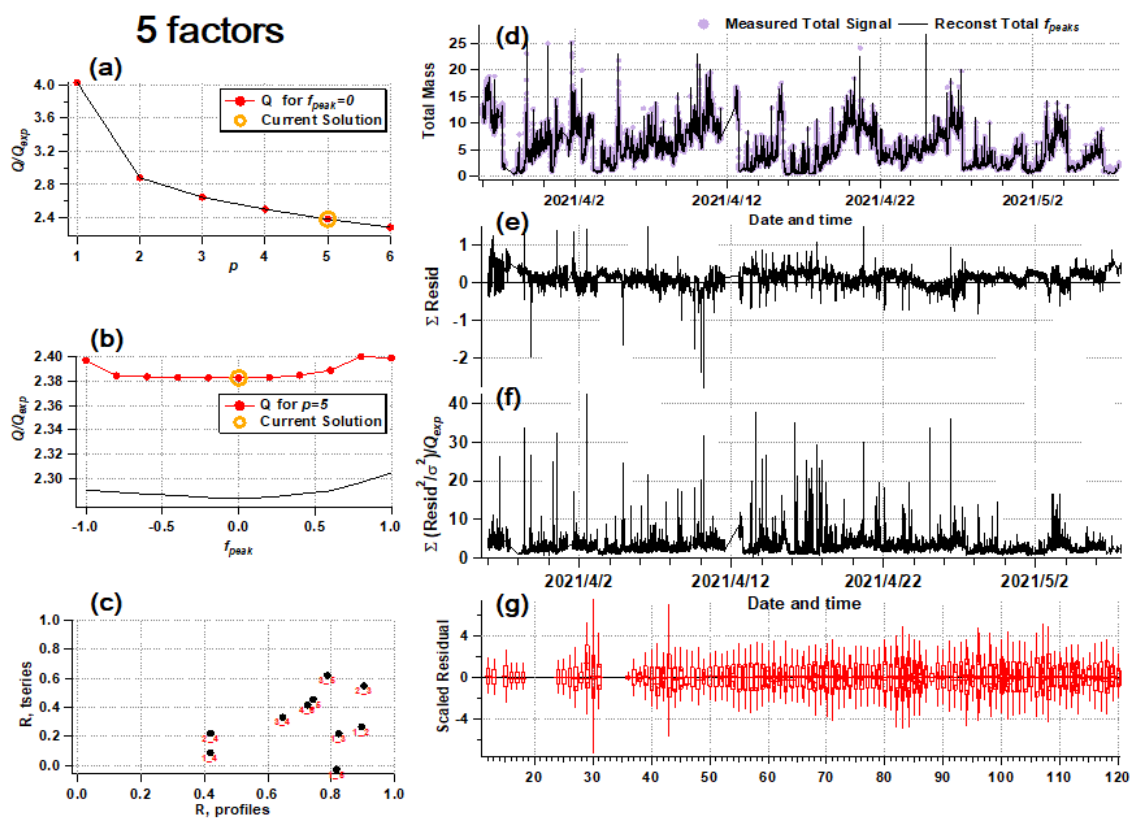

54

55 **Figure S6.2 Diagnostic plots of the 5 factors of PMF analysis on OA mass spectral matrix for the spring observation.**

56

## 6 factors

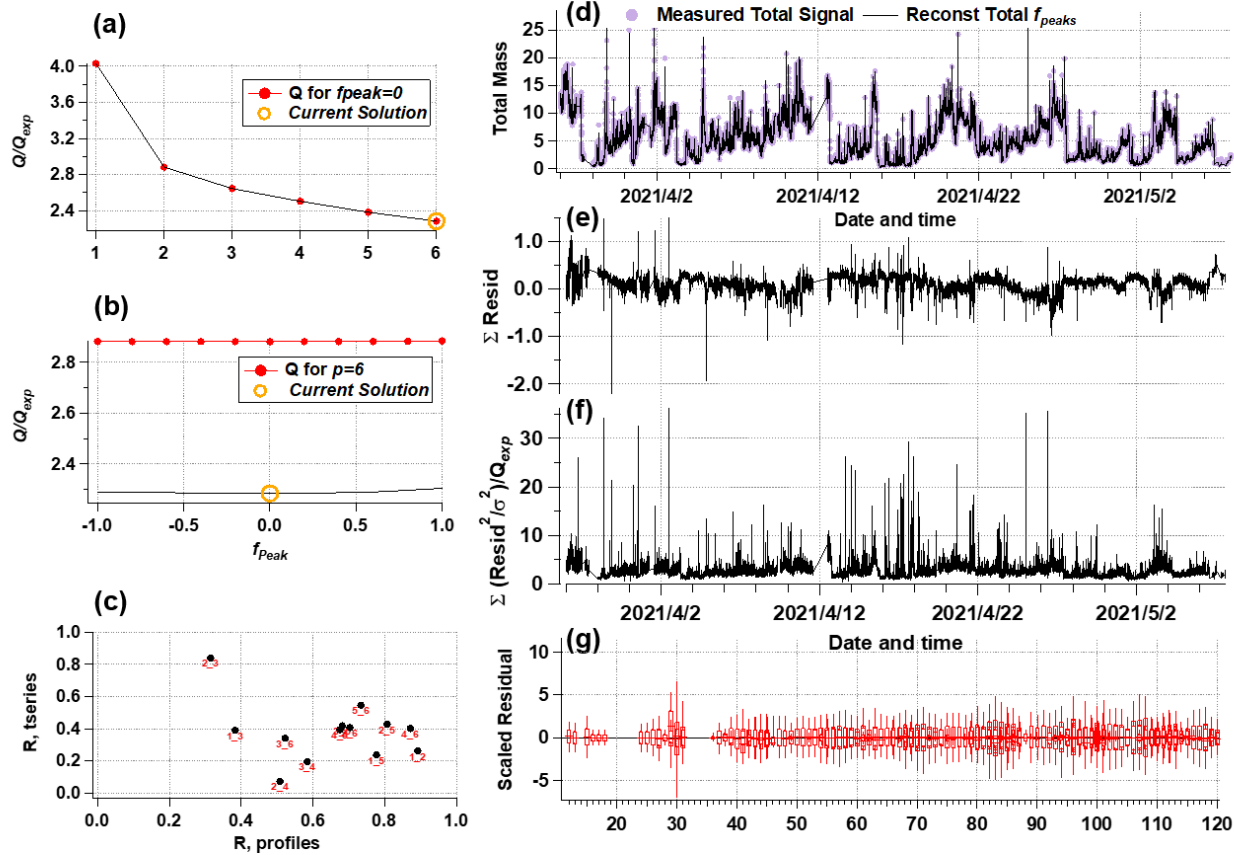

57

58

Figure S6.3 Diagnostic plots of the 6 factors of PMF analysis on OA mass spectral matrix for the spring observation.

59

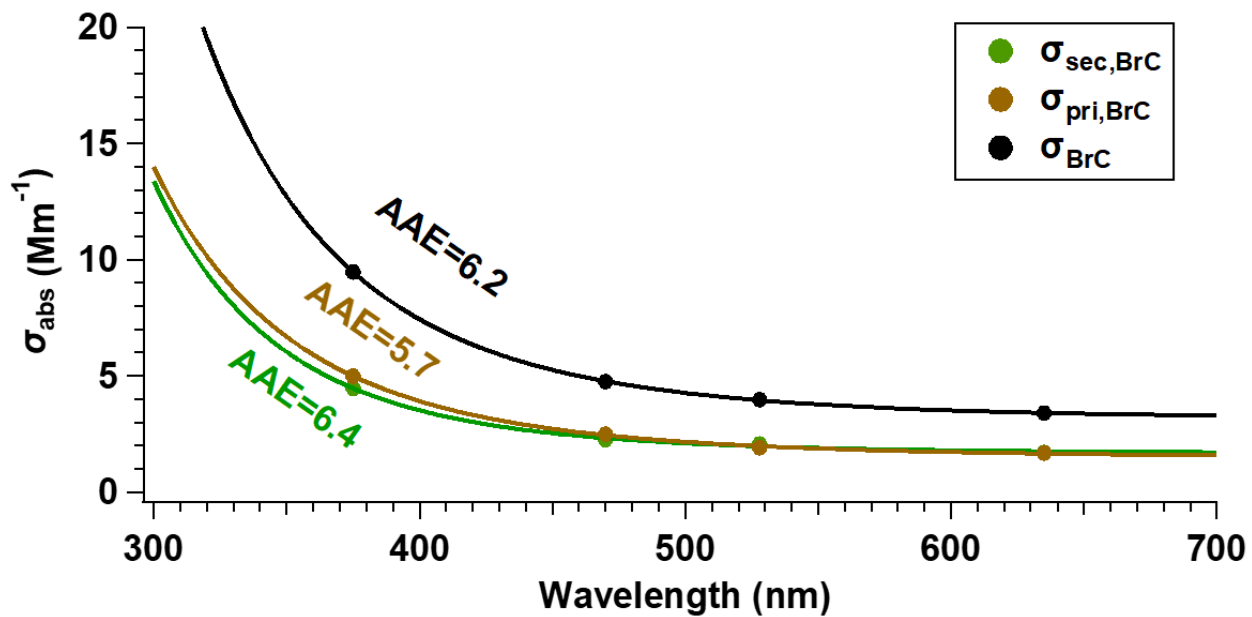

60

61 Figure S7. Absorption coefficient at  $\lambda=375, 470, 528$  and  $635$  nm for total BrC, primary BrC and secondary BrC. The AAE is obtained  
 62 by power fitting on the spectra of absorption coefficient.

63

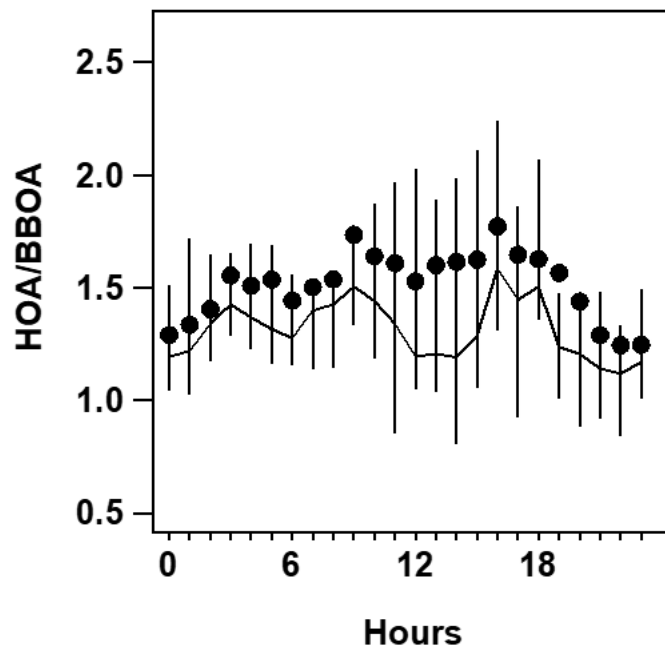

64  
65 Figure S8. Diurnal variations of HOA/BBOA.

66

67 **Table S1. Estimated uncertainties of input and output parameters.**

| <b>Input Parameter</b>                                | <b>Uncertainty (%)</b> | <b>Output Parameter</b> | <b>Uncertainty (%)</b> |
|-------------------------------------------------------|------------------------|-------------------------|------------------------|
| $\left(\frac{\sigma_{abs,total}}{[rBC]_{pri}}\right)$ | 4 <sup>(a)</sup>       | $\sigma_{abs,BrC}$      | 40                     |
| <b>BC mass concentration</b>                          | 20 <sup>(b)</sup>      | $\sigma_{abs,priBrC}$   | 37                     |
| <b>MAC</b>                                            | 27 <sup>(c)</sup>      | $\sigma_{abs,secBrC}$   | 32                     |
| $\sigma_{abs,BC}$                                     | 31                     |                         |                        |
| $\sigma_{abs,pri}$                                    | 20                     |                         |                        |
| $\sigma_{abs,total}$                                  | 25 <sup>(d-e)</sup>    |                         |                        |

68 (a) Wang et al. (2019)

69 (b) Schwarz et al. (2008)

70 (c) Taylor et al. (2015)

71 (d) Duesing et al. (2019)

72 (e) (Drinovec et al., 2015)

73 **References**

74 Drinovec, L., Močnik, G., Zotter, P., Prévôt, A. S. H., Ruckstuhl, C., Coz, E., Rupakheti, M., Sciare, J., Müller, T., Wiedensohler,  
75 A., and Hansen, A. D. A.: The "dual-spot" Aethalometer: an improved measurement of aerosol black carbon with real-time  
76 loading compensation, *Atmos. Meas. Tech.*, 8, 1965-1979, 10.5194/amt-8-1965-2015, 2015.

77 Duesing, S., Wehner, B., Mueller, T., Stoecker, A., and Wiedensohler, A.: The effect of rapid relative humidity changes on fast  
78 filter-based aerosol-particle light-absorption measurements: uncertainties and correction schemes, *Atmospheric Measurement  
79 Techniques*, 12, 5879-5895, 10.5194/amt-12-5879-2019, 2019.

80 Paatero, P. and Tapper, U.: Positive matrix factorization: A non-negative factor model with optimal utilization of error estimates  
81 of data values, *Environmetrics*, 5, 111-126, doi:10.1002/env.3170050203, 1994.

82 Schwarz, J. P., Spackman, J. R., Fahey, D. W., Gao, R. S., Lohmann, U., Stier, P., Watts, L. A., Thomson, D. S., Lack, D. A.,  
83 Pfister, L., Mahoney, M. J., Baumgardner, D., Wilson, J. C., and Reeves, J. M.: Coatings and their enhancement of black carbon  
84 light absorption in the tropical atmosphere, *Journal of Geophysical Research-Atmospheres*, 113, 10.1029/2007jd009042, 2008.

85 Taylor, J. W., Allan, J. D., Liu, D., Flynn, M., Weber, R., Zhang, X., Lefer, B. L., Grossberg, N., Flynn, J., and Coe, H.:  
86 Assessment of the sensitivity of core/shell parameters derived using the single-particle soot photometer to density and  
87 refractive index, *Atmospheric Measurement Techniques*, 8, 1701-1718, 10.5194/amt-8-1701-2015, 2015.

88 Ulbrich, I. M., Canagaratna, M. R., Zhang, Q., Worsnop, D. R., and Jimenez, J. L.: Interpretation of organic components from

89 Positive Matrix Factorization of aerosol mass spectrometric data, *Atmos Chem Phys*, 9, 2891-2918, doi:10.5194/acp-9-2891-  
90 2009, 2009.

91 Wang, Q., Han, Y., Ye, J., Liu, S., Pongpiachan, S., Zhang, N., Han, Y., Tian, J., Wu, C., Long, X., Zhang, Q., Zhang, W., Zhao,  
92 Z., and Cao, J.: High Contribution of Secondary Brown Carbon to Aerosol Light Absorption in the Southeastern Margin of  
93 Tibetan Plateau, *Geophysical Research Letters*, 46, 4962-4970, 10.1029/2019gl082731, 2019.

94 Zhang, Q., Jimenez, J., Canagaratna, M., Ulbrich, I., Ng, N., Worsnop, D., and Sun, Y.: Understanding atmospheric organic  
95 aerosols via factor analysis of aerosol mass spectrometry: a review, *Analytical And Bioanalytical Chemistry*, 401, 3045-3067,  
96 10.1007/s00216-011-5355-y, 2011.

97
